# Supplementary material
Source: MDPI journal article supplement (https://www.mdpi.com/1424-2818/13/5/185)
Supplement: s1 [file s1]

**Genetic distinctiveness but low diversity characterizes rear-edge *Thuja standishii* (Gordon) Carr. (Cupressaceae) populations in southwest Japan: Supplementary Materials**

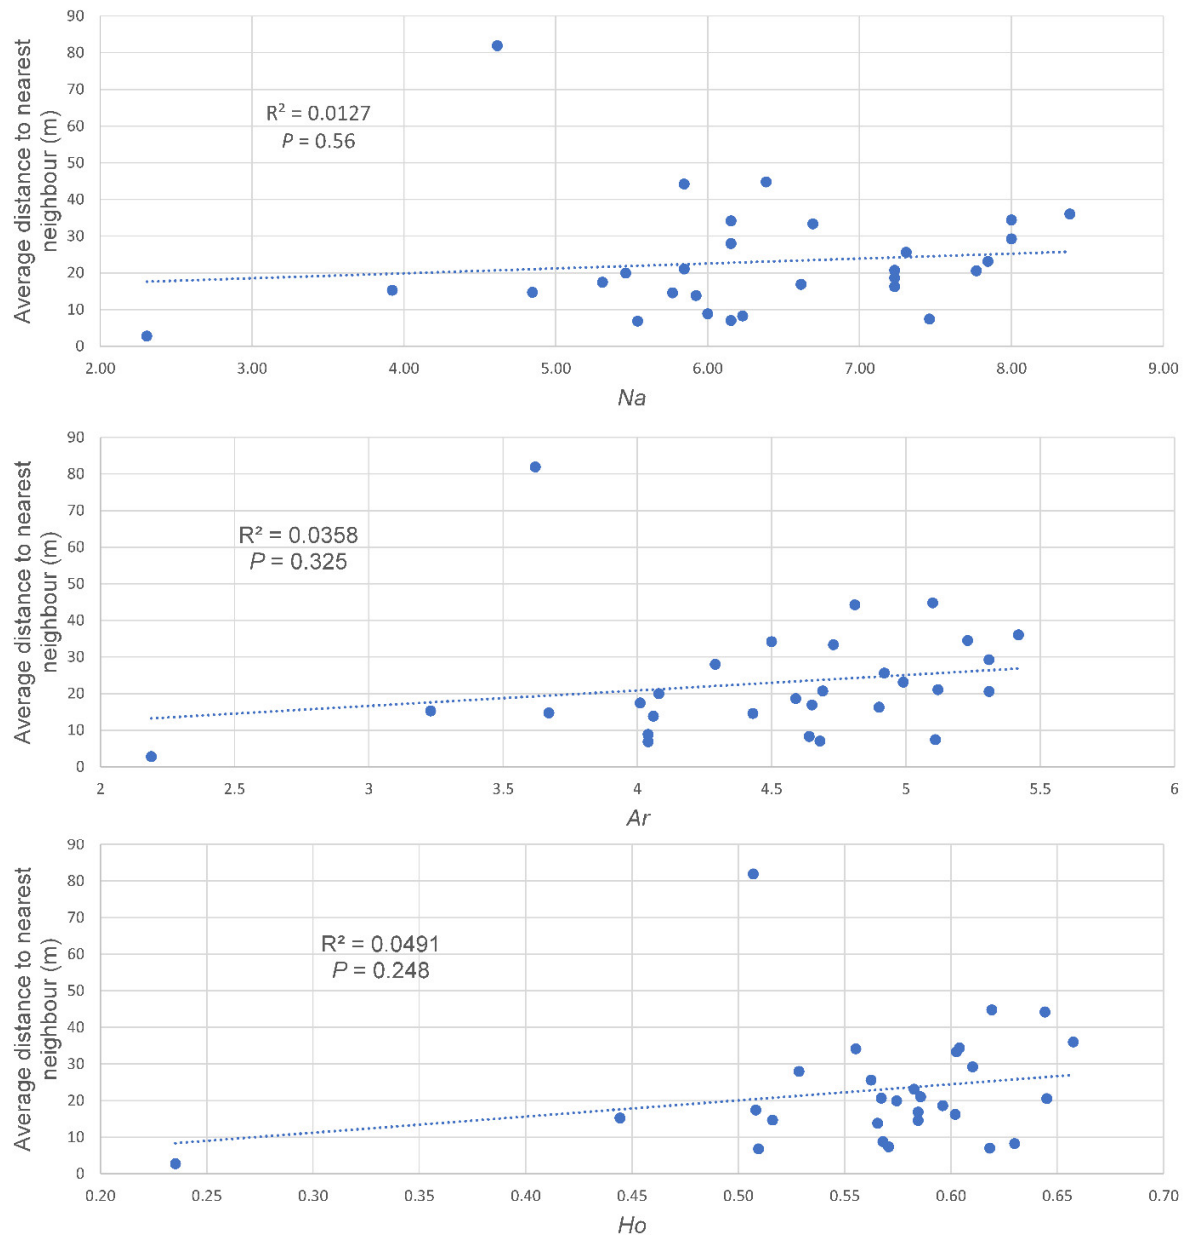

**Figure S1.** Correlation between spatial distancing of samples (m) of the 30 *Thuja standishii* populations versus population-level genetic diversity indices, number of alleles ( $N_a$ ), rarefied allelic richness ( $A_r$ ) and observed heterozygosity ( $H_o$ ).

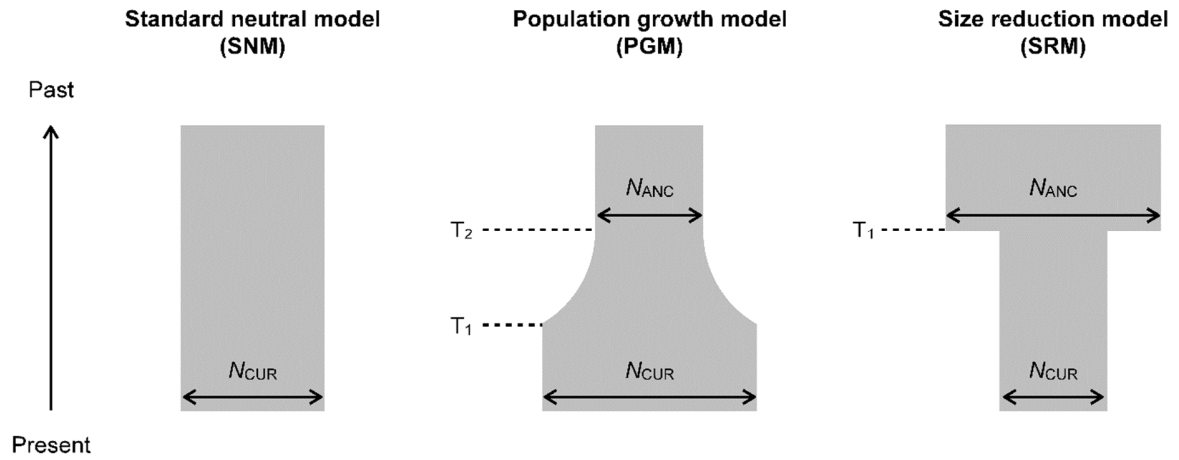

**Figure S2** Comparison of the three population size change models used in the ABC based population size change history analysis.

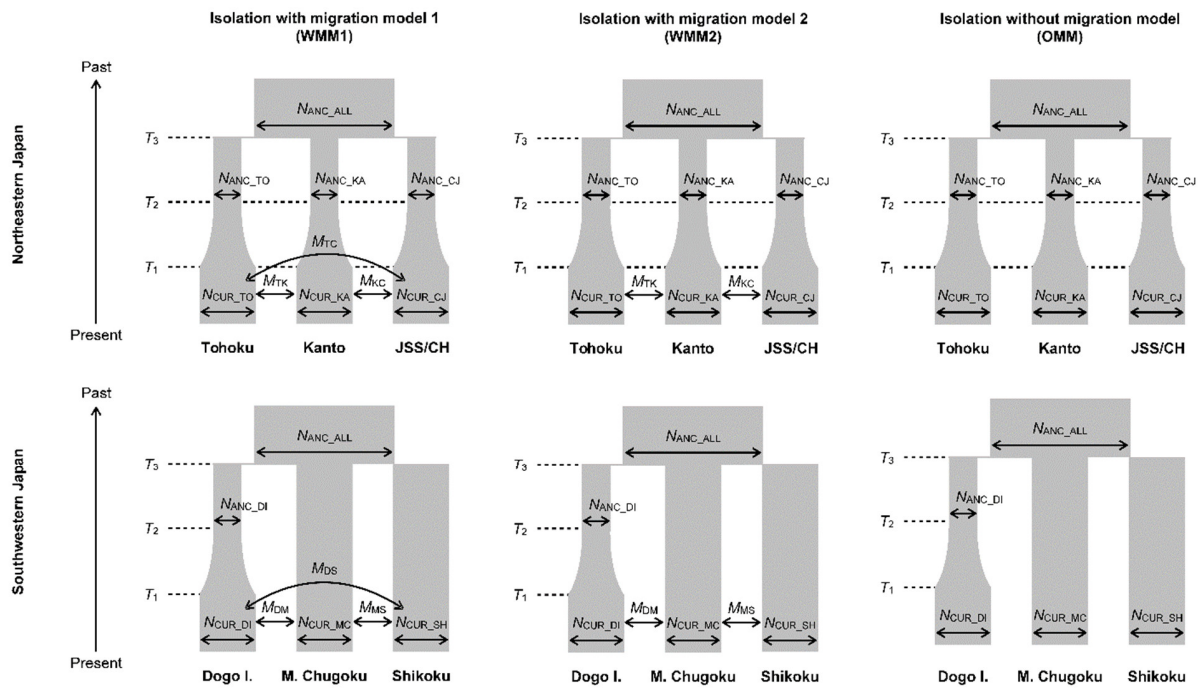

**Figure S3** Comparison of the six population divergence models investigated using ABC. JSS/CH stands for Japan Sea side and central Honshu.

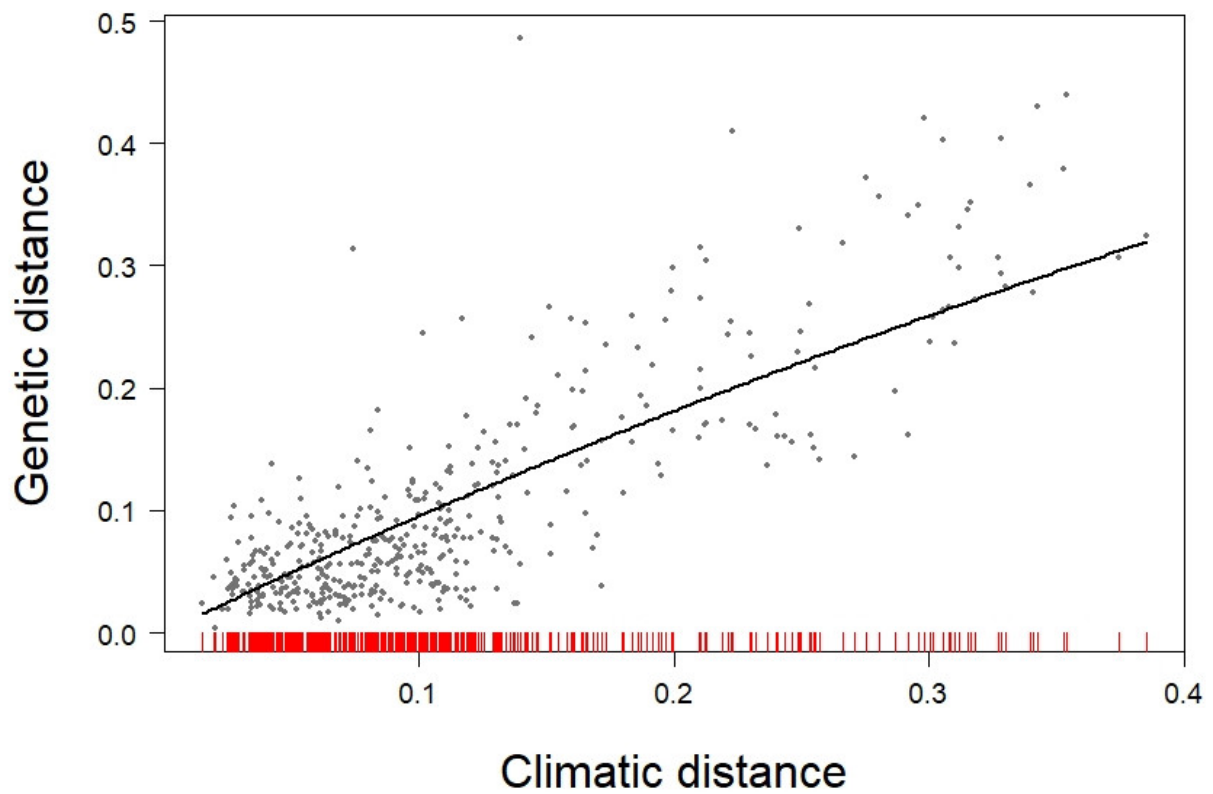

**Figure S4** Visualization of the non-linear relationship between climatic distance (the Euclidian distance between the three climate based PC axes) and genetic distance for the 30 populations of *Thuja standishii*. Points correspond to the site pairs. Red tick marks on the x-axis correspond to the spread of the data used in the analysis.

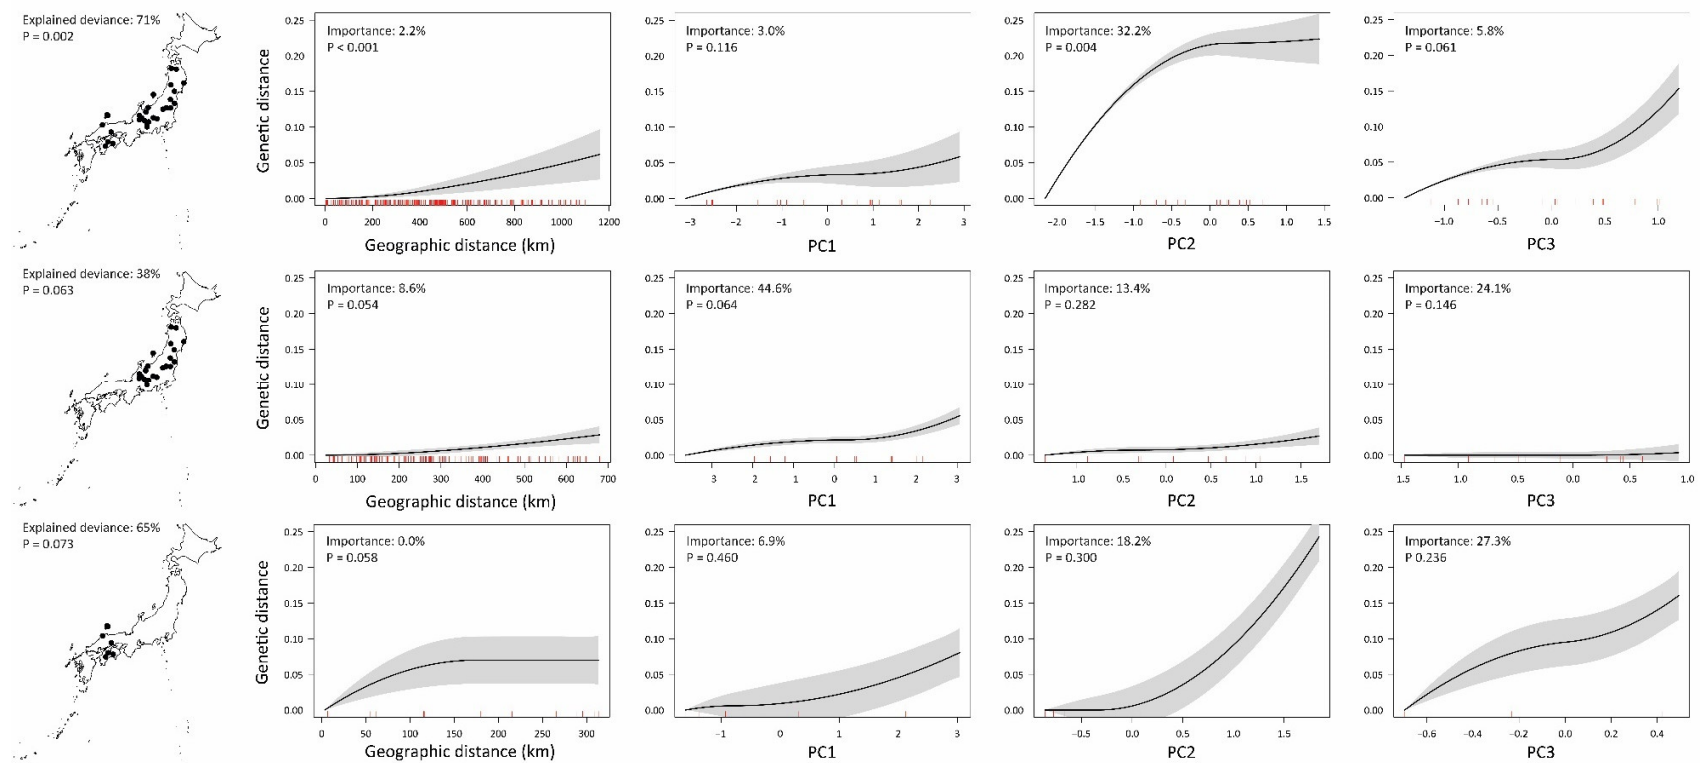

**Figure S5** Visualization of the I-splines and their standard errors estimated from 1000 bootstraps of the Generalized Dissimilarity Model for the 30 populations of *Thuja standishii* (top) and the populations in northeastern (middle) and southwestern Japan (bottom). Shown are the I-splines for geographic distance and climatic distance represented by the first three principal components (PC) of a principal component analysis. The amount of deviance in the genetic distance among the populations each model explained is shown in the left-hand panel. The grey area shows one standard deviation of the bootstrapped I-splines. Red tick marks on the x-axis correspond to the spread of the data used in the analysis.

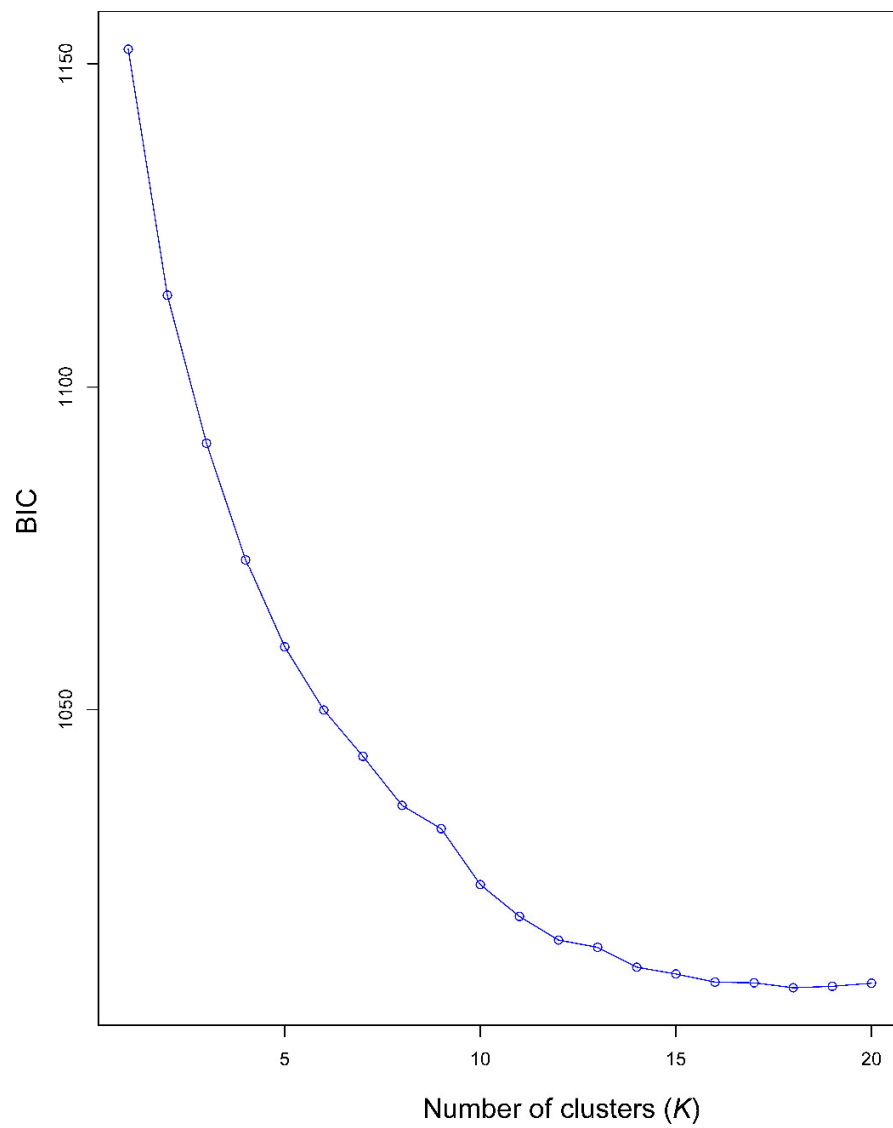

**Figure S6** The value of BIC versus the number of genetic clusters ( $K$ ) identified using DAPC analysis.

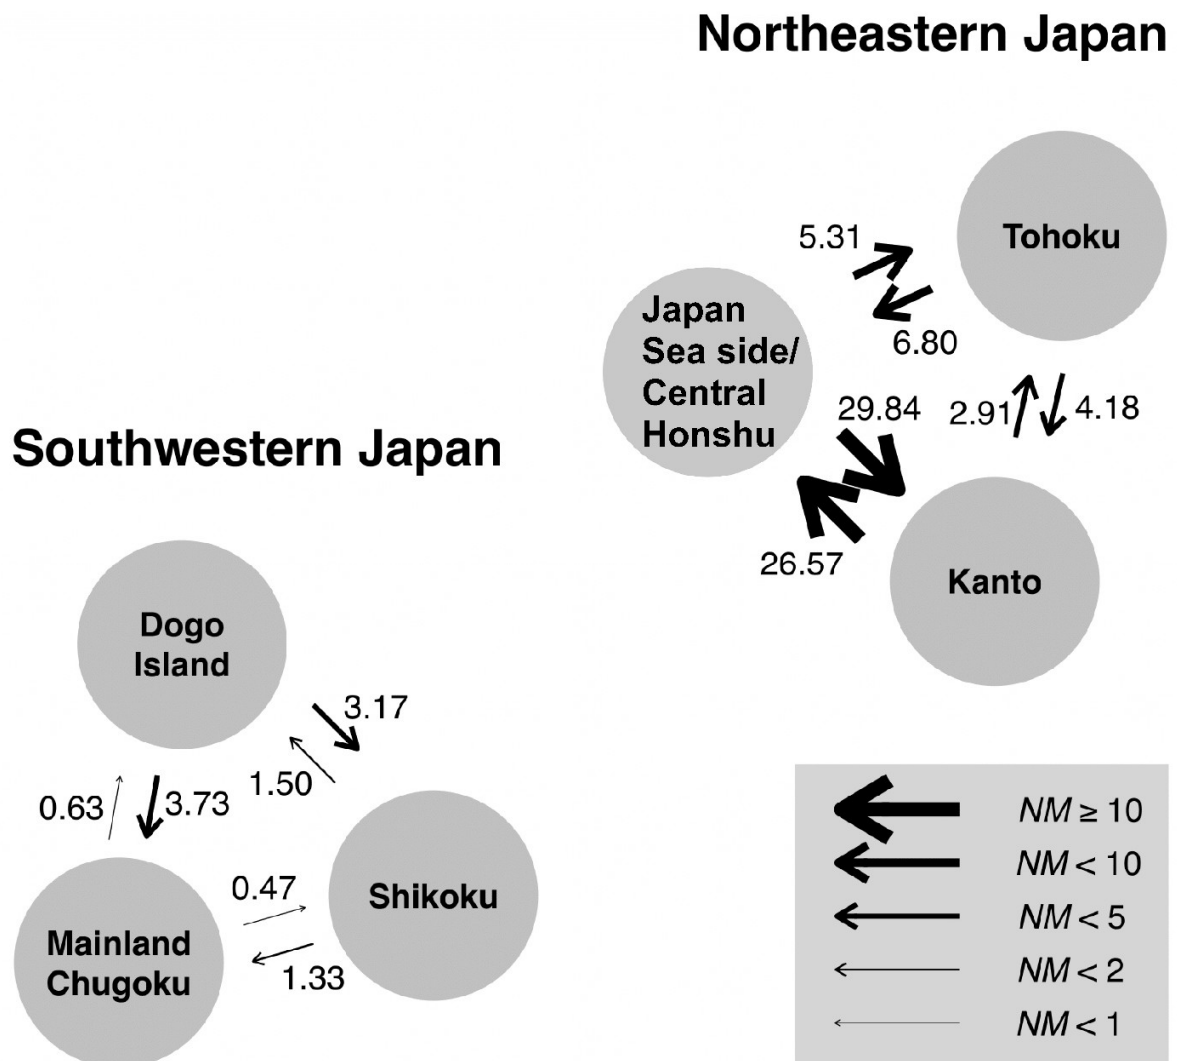

**Figure S7** The average number of migrants per generation ( $NM$ ) from the initial divergence of populations from their ancestral population to the present for the northeastern and southwestern Japan regions.

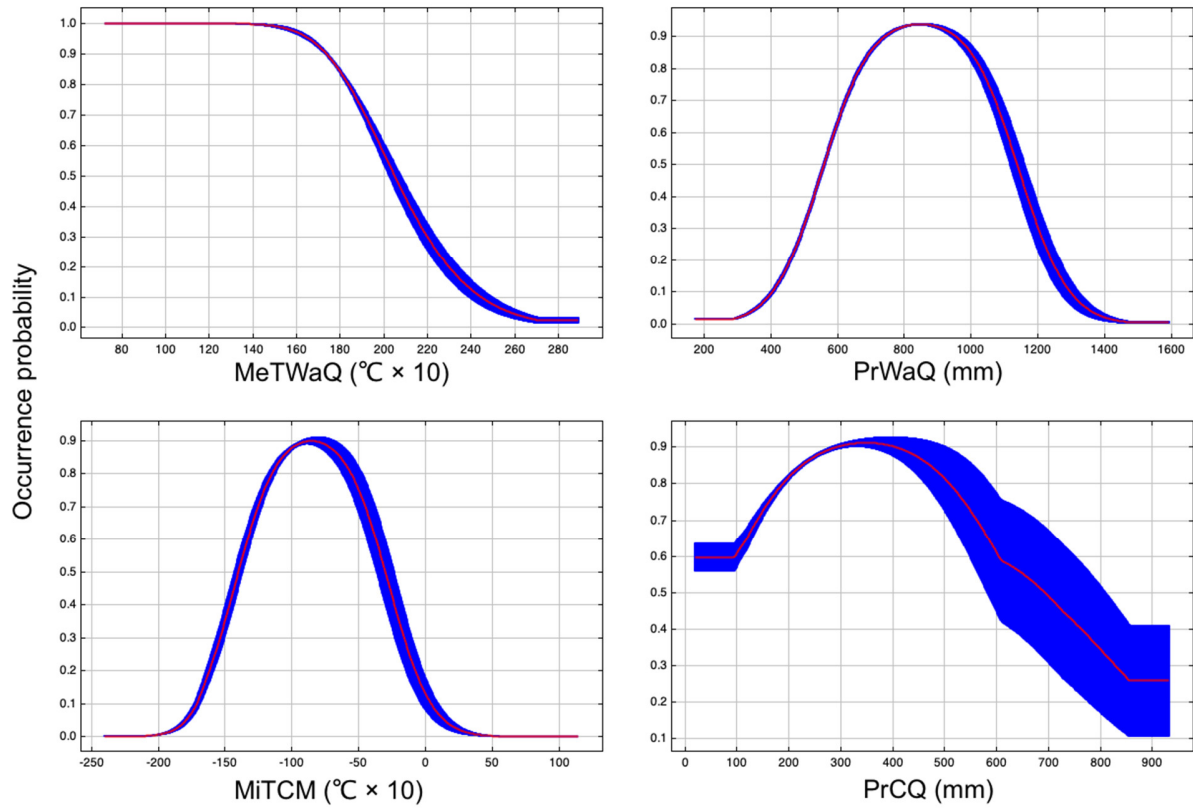

**Figure S8** The response of occurrence probability to the four climatic variables used for species distribution modelling of *Thuja standishii*: mean temperature of warmest quarter (MeTWaQ), precipitation of warmest quarter (PrWaQ), minimum temperature of coldest month (MiTCM) and precipitation of the coldest quarter (PrCQ). The curve show how predicted occurrence probability changes as each variable was varied, keeping all other variables at their average value. The curves show the mean response of the 10 replicate model runs (red line) and the mean  $\pm$  standard deviation (blue areas).

**Table S1** Population-based genetic statistics for the 30 sampled populations of *Thuja standishii* based on thirteen EST microsatellite loci including the number of alleles ( $N_a$ ), number of effective alleles ( $N_e$ ), observed ( $H_o$ ) and expected ( $H_e$ ) heterozygosity, fixation index ( $F_{is}$ ), rarefied allelic richness ( $A_r$ ), rarefied private alleles ( $P_{Ar}$ ) (with the actual number of observed private alleles in brackets) and the probability of re-assignment of individuals to each population based on DAPC analysis. The significance level of deviation from zero of  $F_{is}$  is indicated by asterisks (\*,  $P = 0.01 - 0.05$ ; \*\*,  $P = 0.001 - 0.01$ ; \*\*\*,  $P < 0.001$ ).

| No. | Population        | Abbrev. | Region                         | $N$ | $N_a$ | $N_e$ | $H_o$ | $H_e$ | $F_{is}$ | $A_r$ (9 ind.) | $P_{Ar}$ (9 ind.) | Probability of re-assignment |
|-----|-------------------|---------|--------------------------------|-----|-------|-------|-------|-------|----------|----------------|-------------------|------------------------------|
| 1   | Sakusawa River    | SAS     | Tohoku                         | 32  | 6.15  | 3.06  | 0.56  | 0.57  | 0.039    | 4.5            | 0.13 (1)          | 0.56                         |
| 2   | Lake Towada       | TOW     | Tohoku                         | 32  | 5.46  | 2.84  | 0.57  | 0.59  | 0.036    | 4.08           | 0.13 (1)          | 0.91                         |
| 3   | Mt Goyo           | GOY     | Tohoku                         | 30  | 8.00  | 3.70  | 0.61  | 0.62  | 0.032    | 5.31           | 0.15 (3)          | 0.03                         |
| 4   | Mt Ogoshiki       | OGO     | Tohoku                         | 30  | 6.69  | 3.50  | 0.60  | 0.59  | 0        | 4.73           | 0.13 (3)          | 0.33                         |
| 5   | Mt Ookura         | OOK     | Tohoku                         | 33  | 7.85  | 3.28  | 0.58  | 0.60  | 0.047    | 4.99           | 0.11              | 0.12                         |
| 6   | Nyuugawa          | NYUG    | Tohoku                         | 10  | 4.38  | 2.64  | 0.58  | 0.57  | 0.037    | 4.24           | 0.04              | 0.00                         |
| 7   | Mt Azuma          | AZU     | Tohoku                         | 32  | 7.31  | 3.49  | 0.56  | 0.59  | 0.063*   | 4.92           | 0.17 (4)          | 0.22                         |
| 8   | Mt Otakine        | OTA     | Tohoku                         | 30  | 6.62  | 3.29  | 0.58  | 0.60  | 0.05     | 4.65           | 0.12 (2)          | 0.17                         |
| 9   | Mt Yamizo         | YAM     | Kanto                          | 34  | 5.92  | 2.91  | 0.57  | 0.56  | 0.012    | 4.06           | 0.21 (3)          | 0.15                         |
| 10  | Mt Fuji (Tochigi) | FUJ     | Kanto                          | 32  | 7.23  | 3.13  | 0.57  | 0.58  | 0.041    | 4.69           | 0.12 (1)          | 0.22                         |
| 11  | Yuno Lake         | YUN     | Kanto                          | 20  | 6.38  | 3.77  | 0.62  | 0.65  | 0.07*    | 5.1            | 0.02              | 0.05                         |
| 12  | Ooyamasawa        | OOY     | Kanto                          | 36  | 7.23  | 2.89  | 0.60  | 0.58  | -0.005   | 4.59           | 0.17 (3)          | 0.25                         |
| 13  | Mt Kurohime       | KUR     | Japan Sea side/ Central Honshu | 21  | 6.23  | 3.16  | 0.63  | 0.58  | -0.06    | 4.64           | 0.19 (1)          | 0.33                         |
| 14  | Mt Tate           | TAT     | Japan Sea side/ Central Honshu | 27  | 8.00  | 3.54  | 0.60  | 0.63  | 0.054*   | 5.23           | 0.21 (4)          | 0.00                         |
| 15  | Sanpouiwa Peak    | SAN     | Japan Sea side/ Central Honshu | 31  | 8.38  | 3.92  | 0.66  | 0.69  | 0.057*   | 5.42           | 0.11              | 0.32                         |
| 16  | Nishi Ure Saki    | NIS     | Japan Sea side/ Central Honshu | 31  | 7.77  | 3.88  | 0.65  | 0.65  | 0.023    | 5.31           | 0.1 (3)           | 0.16                         |
| 17  | Nyu Dani          | NYUD    | Japan Sea side/ Central Honshu | 29  | 7.23  | 3.60  | 0.60  | 0.61  | 0.026    | 4.9            | 0.14              | 0.00                         |
| 18  | Kubota Iwa        | KUB     | Japan Sea side/ Central Honshu | 31  | 7.46  | 3.98  | 0.57  | 0.65  | 0.136*** | 5.11           | 0.1 (2)           | 0.00                         |
| 19  | Nagiso Dake       | NAG     | Japan Sea side/ Central Honshu | 16  | 5.85  | 3.33  | 0.64  | 0.59  | -0.069   | 4.81           | 0.19 (1)          | 0.00                         |
| 20  | Shioji Daira      | SHIO    | Japan Sea side/ Central Honshu | 13  | 5.85  | 3.73  | 0.59  | 0.63  | 0.107*   | 5.12           | 0.14 (1)          | 0.00                         |
| 21  | Atebi Daira       | ATE     | Japan Sea side/ Central Honshu | 31  | 6.15  | 3.03  | 0.53  | 0.58  | 0.099**  | 4.29           | 0.06 (1)          | 0.35                         |
| 22  | Shirakoma Lake    | SHIR    | Japan Sea side/ Central Honshu | 26  | 6.00  | 2.59  | 0.57  | 0.54  | -0.026   | 4.04           | 0.12 (1)          | 0.73                         |
| 23  | Kumi Valley       | KUM     | Dogo Island                    | 24  | 5.54  | 2.63  | 0.51  | 0.55  | 0.095**  | 4.04           | 0.03 (1)          | 0.33                         |
| 24  | Takao             | TAK     | Dogo Island                    | 20  | 5.77  | 3.15  | 0.58  | 0.63  | 0.092*   | 4.43           | 0.06 (1)          | 0.20                         |
| 25  | Washigamine       | WAS     | Dogo Island                    | 27  | 6.15  | 3.66  | 0.62  | 0.62  | 0.028    | 4.68           | 0.04              | 0.41                         |

|         |                   |     |                  |       |      |      |      |      |          |      |          |      |
|---------|-------------------|-----|------------------|-------|------|------|------|------|----------|------|----------|------|
| 26      | Mt Hanataka       | HAN | mainland Chugoku | 27    | 4.62 | 2.44 | 0.51 | 0.53 | 0.058    | 3.62 | 0.03 (1) | 0.93 |
| 27      | Goukei Valley     | GOU | mainland Chugoku | 17    | 2.31 | 1.71 | 0.24 | 0.32 | 0.301*** | 2.19 | 0        | 0.82 |
| 28      | Monobe Valley     | MON | Shikoku          | 36    | 3.92 | 2.19 | 0.44 | 0.49 | 0.105**  | 3.23 | 0.08 (1) | 0.83 |
| 29      | Mt Higashiakaishi | HIG | Shikoku          | 28    | 5.31 | 2.86 | 0.51 | 0.53 | 0.059    | 4.01 | 0.01     | 0.86 |
| 30      | Mt Torigata       | TOR | Shikoku          | 31    | 4.85 | 2.40 | 0.52 | 0.50 | -0.018   | 3.67 | 0.11     | 0.94 |
| Average |                   |     |                  | 27.23 | 6.22 | 3.14 | 0.57 | 0.58 | 0.05     | 4.49 | 0.11     | 0.34 |

**Table S2** For each population where clones were identified, the number of different clones (i.e. identical genotypes) identified, number of samples comprising the clones and number of samples excluded from analyses are shown.

| Population            | No. of clones | No. of samples comprising clones | No. of samples excluded |
|-----------------------|---------------|----------------------------------|-------------------------|
| Goukei (GOU)          | 6             | 13                               | 7                       |
| Mt Hanataka (HAN)     | 1             | 2                                | 1                       |
| Kumi Valley (KUM)     | 1             | 2                                | 1                       |
| Mt Kurohime (KUR)     | 3             | 7                                | 4                       |
| Nyuugawa (NYUG)       | 3             | 19                               | 16                      |
| Mt Otakine (OTA)      | 1             | 2                                | 1                       |
| Shirakoma Lake (SHIR) | 2             | 4                                | 2                       |
| Washigamine (WAS)     | 1             | 2                                | 1                       |
| Total                 | 18            | 51                               | 33                      |

**Table S3** Prior distributions of structural parameters in each demographic model.

| Analysis               | Model           | Parameter      | Distribution                          |
|------------------------|-----------------|----------------|---------------------------------------|
| Population size change | SNM             | $N_{CUR}$      | Uniform (10, $5 \times 10^4$ )        |
|                        |                 | $N_{CUR}^a$    | Uniform ( $10^4$ , $2 \times 10^5$ )  |
|                        | PGM             | $N_{ANC}^a$    | Uniform (10, $3 \times 10^4$ )        |
|                        |                 | $T_1^b$        | Log-uniform (1, $10^3$ )              |
|                        |                 | $T_2^b$        | Log-uniform (1, $10^3$ )              |
|                        |                 | $N_{CUR}^c$    | Uniform (10, $3 \times 10^4$ )        |
|                        |                 | $N_{ANC}^c$    | Uniform ( $10^4$ , $2 \times 10^5$ )  |
|                        |                 | $T_1$          | Log-uniform (1, $10^3$ )              |
| Population divergence  | WMM1, WMM2, OMM | $N_{ANC\_ALL}$ | Uniform (10, $2 \times 10^5$ )        |
|                        |                 | $T_3$          | Log-uniform ( $10^3$ , $10^5$ )       |
|                        |                 | $M_{XY}^d$     | Log-uniform ( $10^{-5}$ , $10^{-3}$ ) |

<sup>a</sup> Always  $N_{CUR} > N_{ANC}$ .

<sup>b</sup> Always  $T_1 > T_2$ .

<sup>c</sup> Always  $N_{CUR} < N_{ANC}$ .

<sup>d</sup>  $M_{XY}$  is a migration rate between regions X and Y.

**Table S4** Summary of BayeScan results for each of three independent runs for all 13 EST microsatellites.

p = the posterior probability for the model including selection; log10(PO) = the logarithm of posterior odds; alpha= a coefficient indicating the strength and direction of selection (+ve indicates diversifying while -ve indicates balancing).

|              | Run 1   |           |          | Run 2   |           |          | Run 3   |           |          |
|--------------|---------|-----------|----------|---------|-----------|----------|---------|-----------|----------|
| Locus        | p       | log10(PO) | alpha    | p       | log10(PO) | alpha    | p       | log10(PO) | alpha    |
| Kurobe_18480 | 0.00020 | -3.69880  | -0.00003 | 0.00040 | -3.39768  | -0.00006 | 0.00000 | -1000     | 0.00000  |
| Kurobe_2969  | 0.00040 | -3.39770  | 0.00001  | 0.00060 | -3.22150  | -0.00012 | 0.00080 | -3.09650  | -0.00012 |
| Kurobe_23700 | 0.00000 | -1000     | 0.00000  | 0.00020 | -3.69880  | -0.00012 | 0.00020 | -3.69880  | -0.00003 |
| Kurobe_44557 | 0.01840 | -1.72700  | -0.00858 | 0.02921 | -1.52170  | -0.01404 | 0.03821 | -1.40090  | -0.01779 |
| Kurobe_15129 | 0.00140 | -2.85320  | 0.00066  | 0.00140 | -2.85320  | 0.00048  | 0.00120 | -2.92020  | 0.00049  |
| Kurobe_16758 | 0.00040 | -3.39770  | 0.00003  | 0.00020 | -3.69880  | -0.00005 | 0.00080 | -3.09650  | 0.00002  |
| Kurobe_6943  | 0.00140 | -2.85320  | 0.00051  | 0.00160 | -2.79510  | 0.00096  | 0.00120 | -2.92020  | 0.00045  |
| Kurobe_23263 | 0.00200 | -2.69800  | -0.00142 | 0.00140 | -2.85320  | -0.00089 | 0.00060 | -3.22150  | -0.00044 |
| Kurobe_38308 | 0.00000 | -1000     | 0.00000  | 0.00120 | -2.92020  | 0.00045  | 0.00000 | -1000     | 0.00000  |
| Kurobe_41636 | 0.00040 | -3.39770  | 0.00005  | 0.00040 | -3.39770  | 0.00002  | 0.00060 | -3.22150  | 0.00055  |
| Kurobe_42400 | 0.00020 | -3.69880  | -0.00001 | 0.00020 | -3.69880  | 0.00000  | 0.00000 | -1000     | 0.00000  |
| Kurobe_40825 | 0.00040 | -3.39770  | -0.00004 | 0.00000 | -1000     | 0.00000  | 0.00020 | -3.69880  | -0.00003 |
| Kurobe_4219  | 0.00080 | -3.09650  | -0.00030 | 0.00020 | -3.69880  | -0.00005 | 0.00040 | -3.39770  | -0.00014 |

**Table S5** Summary of the results of FreeNa software for the 13 nuclear loci used for genetic analyses.

| Locus        | Average<br>Estimate<br>of null<br>allele<br>(ENA)<br>frequency<br>per<br>population | <i>Fst</i> not<br>using<br>ENA | <i>Fst</i><br>using<br>ENA |
|--------------|-------------------------------------------------------------------------------------|--------------------------------|----------------------------|
| Kurobe_18480 | 0.009                                                                               | 0.097                          | 0.097                      |
| Kurobe_2969  | 0.013                                                                               | 0.096                          | 0.093                      |
| Kurobe_23700 | 0.010                                                                               | 0.080                          | 0.079                      |
| Kurobe_44557 | 0.059                                                                               | 0.068                          | 0.063                      |
| Kurobe_15129 | 0.029                                                                               | 0.132                          | 0.126                      |
| Kurobe_16758 | 0.015                                                                               | 0.093                          | 0.093                      |
| Kurobe_6943  | 0.011                                                                               | 0.131                          | 0.128                      |
| Kurobe_23263 | 0.024                                                                               | 0.068                          | 0.067                      |
| Kurobe_38308 | 0.014                                                                               | 0.102                          | 0.100                      |
| Kurobe_41636 | 0.017                                                                               | 0.045                          | 0.046                      |
| Kurobe_42400 | 0.020                                                                               | 0.061                          | 0.059                      |
| Kurobe_40825 | 0.022                                                                               | 0.073                          | 0.072                      |
| Kurobe_4219  | 0.055                                                                               | 0.089                          | 0.085                      |
| Average      | 0.023                                                                               | 0.087                          | 0.085                      |

**Table S6** Results of heterozygosity excess and mode-shift bottleneck tests for each population.

| No. | Population        | Abbrev. | Region                         | Mode Shift                   | Excess<br>Heterozygosity-<br>Wilcoxon<br>signed-rank test |
|-----|-------------------|---------|--------------------------------|------------------------------|-----------------------------------------------------------|
| 1   | Sakusawa River    | SAS     | Tohoku                         | normal L-shaped distribution | 0.959                                                     |
| 2   | Lake Towada       | TOW     | Tohoku                         | normal L-shaped distribution | 0.729                                                     |
| 3   | Mt Goyo           | GOY     | Tohoku                         | normal L-shaped distribution | 1.000                                                     |
| 4   | Mt Ogoshiki       | OGO     | Tohoku                         | normal L-shaped distribution | 0.945                                                     |
| 5   | Mt Ookura         | OOK     | Tohoku                         | normal L-shaped distribution | 0.998                                                     |
| 6   | Nyuugawa          | NYUU    | Tohoku                         | normal L-shaped distribution | 0.773                                                     |
| 7   | Mt Azuma          | AZU     | Tohoku                         | normal L-shaped distribution | 0.999                                                     |
| 8   | Mt Otakine        | OTA     | Tohoku                         | normal L-shaped distribution | 0.772                                                     |
| 9   | Mt Yamizo         | YAM     | Kanto                          | normal L-shaped distribution | 0.892                                                     |
| 10  | Mt Fuji (Tochigi) | FUJ     | Kanto                          | normal L-shaped distribution | 0.987                                                     |
| 11  | Yuno Lake         | YUN     | Kanto                          | normal L-shaped distribution | 0.683                                                     |
| 12  | Ooyamasawa        | OOY     | Kanto                          | normal L-shaped distribution | 0.972                                                     |
| 13  | Mt Kurohime       | KUR     | Japan Sea side/ Central Honshu | normal L-shaped distribution | 0.993                                                     |
| 14  | Mt Tate           | TAT     | Japan Sea side/ Central Honshu | normal L-shaped distribution | 0.993                                                     |
| 15  | Sanpouiwa Peak    | SAN     | Japan Sea side/ Central Honshu | normal L-shaped distribution | 0.944                                                     |
| 16  | Nishi Ure Saki    | NIS     | Japan Sea side/ Central Honshu | normal L-shaped distribution | 0.993                                                     |
| 17  | Nyu Dani          | NYUD    | Japan Sea side/ Central Honshu | normal L-shaped distribution | 0.990                                                     |
| 18  | Kubota Iwa        | KUB     | Japan Sea side/ Central Honshu | normal L-shaped distribution | 0.879                                                     |
| 19  | Nagiso Dake       | NAG     | Japan Sea side/ Central Honshu | normal L-shaped distribution | 0.863                                                     |
| 20  | Shioji Daira      | SHIO    | Japan Sea side/ Central Honshu | normal L-shaped distribution | 0.773                                                     |
| 21  | Atebi Daira       | ATE     | Japan Sea side/ Central Honshu | normal L-shaped distribution | 0.847                                                     |
| 22  | Shirakoma Lake    | SHIR    | Japan Sea side/ Central Honshu | normal L-shaped distribution | 0.997                                                     |
| 23  | Kumi Valley       | KUM     | Dogo Island                    | normal L-shaped distribution | 0.945                                                     |
| 24  | Takao             | TAK     | Dogo Island                    | normal L-shaped distribution | 0.752                                                     |

|    |                   |     |                  |                              |       |
|----|-------------------|-----|------------------|------------------------------|-------|
| 25 | Washigamine       | WAS | Dogo Island      | normal L-shaped distribution | 0.581 |
| 26 | Mt Hanataka       | HAN | mainland Chugoku | normal L-shaped distribution | 0.863 |
| 27 | Goukei Valley     | GOU | mainland Chugoku | <b>shifted mode</b>          | 0.080 |
| 28 | Monobe Valley     | MON | Shikoku          | normal L-shaped distribution | 0.393 |
| 29 | Mt Higashiakaishi | HIG | Shikoku          | normal L-shaped distribution | 0.936 |
| 30 | Mt Torigata       | TOR | Shikoku          | normal L-shaped distribution | 0.878 |

---

**Table S7** Summary of ABC-RF model comparison.

| Region   | Proportion of votes |              |       |              |       |       | Posterior probability | Classification error rate |
|----------|---------------------|--------------|-------|--------------|-------|-------|-----------------------|---------------------------|
|          | SNM                 | PGM          | SRM   | WMM1         | WMM2  | OMM   |                       |                           |
| Tohoku   | 0.135               | <b>0.851</b> | 0.014 |              |       |       | 0.914                 | 0.330                     |
| Kanto    | 0.123               | <b>0.853</b> | 0.024 |              |       |       | 0.857                 | 0.335                     |
| JSS/CH   | 0.282               | <b>0.669</b> | 0.049 |              |       |       | 0.715                 | 0.325                     |
| Dogo I   | 0.324               | <b>0.634</b> | 0.042 |              |       |       | 0.583                 | 0.337                     |
| M        | <b>0.598</b>        | 0.394        | 0.008 |              |       |       | 0.633                 | 0.350                     |
| Chugoku  |                     |              |       |              |       |       |                       |                           |
| Shikoku  | 0.451               | <b>0.516</b> | 0.033 |              |       |       | 0.533                 | 0.334                     |
| NE Japan |                     |              |       | <b>0.646</b> | 0.247 | 0.107 | 0.699                 | 0.166                     |
| SW Japan |                     |              |       | <b>0.559</b> | 0.313 | 0.128 | 0.612                 | 0.185                     |

The best model was shown in bold. Note that JSS/CH stands for the Japan Sea side/ Central Honshu

<sup>a</sup> SNM, standard neutral model; PGM, population growth model; SRM, size reduction model

**Table S8** Posterior mode and 95% highest posterior density of structural parameters in the best demographic models.

| Region       | $N_{\text{CUR}}$<br>( $\times 10^3$ ) | $N_{\text{ANC}}$<br>( $\times 10^3$ ) | $T_1$<br>(kya)            | $T_2$<br>(kya)         | $N_{\text{ANC\_ALL}}$<br>( $\times 10^3$ ) | $T_3$<br>(kya)         | $M_{\text{TK}}$<br>( $\times 10^{-5}$ ) | $M_{\text{TC}}$<br>( $\times 10^{-5}$ ) | $M_{\text{KC}}$<br>( $\times 10^{-5}$ ) | $M_{\text{DM}}$<br>( $\times 10^{-5}$ ) | $M_{\text{DS}}$<br>( $\times 10^{-5}$ ) | $M_{\text{MS}}$<br>( $\times 10^{-5}$ ) |
|--------------|---------------------------------------|---------------------------------------|---------------------------|------------------------|--------------------------------------------|------------------------|-----------------------------------------|-----------------------------------------|-----------------------------------------|-----------------------------------------|-----------------------------------------|-----------------------------------------|
| Tohoku       | 185<br>(71.9–<br>200)                 | 9.47<br>(2.83–<br>25.9)               | 34.3<br>(0.230–<br>110)   | 132<br>(40.8–<br>150)  |                                            |                        |                                         |                                         |                                         |                                         |                                         |                                         |
| Kanto        | 176<br>(73.1–<br>200)                 | 7.04<br>(2.93–<br>24.1)               | 16.2<br>(0.172–<br>87.1)  | 120<br>(25.5–<br>150)  |                                            |                        |                                         |                                         |                                         |                                         |                                         |                                         |
| JSS/CH       | 186<br>(73.2–<br>199.9)               | 12.7<br>(7.84–<br>28.1)               | 7.40<br>(1.06–<br>27.1)   | 127<br>(71.3–<br>150)  |                                            |                        |                                         |                                         |                                         |                                         |                                         |                                         |
| Dogo I       | 150<br>(27.4–<br>196)                 | 11.8<br>(6.08–<br>27.8)               | 0.835<br>(0.151–<br>30.7) | 67.5<br>(3.57–<br>150) |                                            |                        |                                         |                                         |                                         |                                         |                                         |                                         |
| M<br>Chugoku | 4.03<br>(2.37–<br>7.07)               |                                       |                           |                        |                                            |                        |                                         |                                         |                                         |                                         |                                         |                                         |
| Shikoku      | 11.3<br>(5.03–<br>25.6)               |                                       |                           |                        |                                            |                        |                                         |                                         |                                         |                                         |                                         |                                         |
| NE Japan     |                                       |                                       |                           |                        | 1.05<br>(0.017–<br>16.1)                   | 176<br>(150–<br>2730)  | 5.86<br>(1.03–<br>38.12)                | 9.53<br>(1.48–<br>51.67)                | 53.53<br>(11.09–<br>99.62)              |                                         |                                         |                                         |
| SW Japan     |                                       |                                       |                           |                        | 15.4<br>(0.040–<br>159)                    | 250<br>(153–<br>11412) |                                         |                                         |                                         | 15.65<br>(1.51–<br>59.81)               | 13.31<br>(1.84–<br>68.47)               | 11.73<br>(1.40–<br>46.99)               |

Note that JSS/CH stands for the Japan Sea side/ Central Honshu

**Table S9** The percent contribution and permutation importance of each of the four bioclimatic variables used for species distribution modelling: mean temperature of warmest quarter (MeTWaQ), precipitation of warmest quarter (PrWaQ), minimum temperature of coldest month (MiTCM) and precipitation of the coldest quarter (PrCQ).

| Variables   | Percent<br>contribution<br>(%) | Permutation<br>importance<br>(%) |
|-------------|--------------------------------|----------------------------------|
| MeTWaQ (°C) | 48.7                           | 35.0                             |
| PrWaQ (mm)  | 30.7                           | 32.1                             |
| MiTCM (°C)  | 19.0                           | 29.1                             |
| PrCQ (mm)   | 1.6                            | 3.8                              |
